# Supplementary material for: The Implant Proteome—The Right Surgical Glue to Fix Titanium Implants In Situ
Source: MDPI journal article supplement (doi:10.3390/jfb13020044), 2022-04-15
Supplement: s1 [file s1]

# Full version of the tables

Tables in this article have been decreased in complexity. Complete versions of these tables can be found here:

**Table 4-S.** Shortlist of the 10 most abundant proteins eluted from the implant surfaces after different incubation times. These proteins were selected among top 200 proteins identified with the highest number of peptides (based on all datasets). For each localization (intracellular/membrane, secreted to blood, ECM), proteins were ranked based on the average abundance in the respective group. The rank of proteins belonging to the top 10 with the highest abundance is in bold. Proteins are sorted based on the abundance rank in the compiled dataset. Abbreviations: Avg. Abund. – ppm normalised protein abundance, ECM – extracellular matrix.

| Name                              | # peptides | Compiled dataset (n=26) |      | Rough surface, 2min (n=7) |      | Rough surface, 5min (n=6) |      | Smooth surface, 2min (n=7) |      | Smooth surface, 5min (n=6) |      |
|-----------------------------------|------------|-------------------------|------|---------------------------|------|---------------------------|------|----------------------------|------|----------------------------|------|
|                                   |            | Avg. Abund.             | Rank | Avg. Abund.               | Rank | Avg. Abund.               | Rank | Avg. Abund.                | Rank | Avg. Abund.                | Rank |
| Intracellular/Membrane            |            |                         |      |                           |      |                           |      |                            |      |                            |      |
| Hemoglobin subunit beta           | 25         | 139291.93               | 1    | 154876.33                 | 1    | 144721.00                 | 1    | 163403.4                   | 1    | 87550.99                   | 1    |
| Hemoglobin subunit alpha          | 25         | 42991.18                | 2    | 54101.03                  | 2    | 47291.11                  | 2    | 48580.9                    | 2    | 19208.4                    | 2    |
| Protein AHNAK2                    | 10         | 5187.38                 | 3    | 8124.87                   | 3    | 2044.41                   | 10   | 4790.61                    | 5    | 5366.17                    | 4    |
| Keratin, type II cytoskeletal 1   | 21         | 4755.28                 | 4    | 4662.82                   | 7    | 2663.98                   | 9    | 5921.46                    | 3    | 5593.91                    | 3    |
| Hemoglobin subunit delta          | 12         | 4421.55                 | 5    | 6909.44                   | 4    | 5956.87                   | 3    | 2431.57                    | 8    | 2305.33                    | 6    |
| Actin, cytoplasmic 1              | 16         | 3895.84                 | 6    | 4989.7                    | 6    | 4864.7                    | 4    | 3279.31                    | 6    | 2370.12                    | 5    |
| Carbonic anhydrase 1              | 19         | 3776.61                 | 7    | 5678.07                   | 5    | 4021.49                   | 5    | 3192.65                    | 7    | 1994.63                    | 7    |
| Spectrin beta chain, erythrocytic | 40         | 2911.55                 | 8    | 1171.39                   | 15   | 3219.65                   | 7    | 5547.45                    | 4    | 1558.4                     | 8    |
| Myosin-7                          | 99         | 2564.4                  | 9    | 4190.33                   | 8    | 3847.96                   | 6    | 1232.44                    | 11   | 937.86                     | 12   |
| Peroxiredoxin-2                   | 16         | 2186.3                  | 10   | 2928.72                   | 9    | 3019.12                   | 8    | 1504.49                    | 9    | 1282.77                    | 9    |
| Carbonic anhydrase 2              | 16         | 989.25                  | 11   | 1546.26                   | 10   | 929.53                    | 16   | 1118.97                    | 12   | 247.78                     | 29   |
| Titin                             | 75         | 891.83                  | 15   | 721.44                    | 20   | 1116.26                   | 13   | 655.53                     | 20   | 1141.86                    | 10   |
| Vimentin                          | 24         | 797.95                  | 16   | 1191.67                   | 13   | 253.5                     | 38   | 1470.35                    | 10   | 98.57                      | 44   |
| Secreted to blood                 |            |                         |      |                           |      |                           |      |                            |      |                            |      |
| Serum albumin                     | 99         | 70046.62                | 1    | 79197.19                  | 1    | 71030.02                  | 1    | 66819.75                   | 1    | 62152.23                   | 1    |
| Alpha-1-antichymotrypsin          | 12         | 7424.58                 | 2    | 4625.31                   | 2    | 4935.14                   | 2    | 11778.05                   | 2    | 8100.8                     | 2    |
| Fibrinogen beta chain             | 28         | 2523.37                 | 3    | 2746.04                   | 5    | 1780.6                    | 7    | 2304.23                    | 4    | 3262.02                    | 3    |
| Alpha-1-antitrypsin               | 27         | 2361.18                 | 4    | 3092.83                   | 4    | 3936                      | 3    | 1241.14                    | 8    | 1239.48                    | 8    |
| Fibrinogen gamma chain            | 26         | 2286.78                 | 5    | 1842.04                   | 7    | 1588.86                   | 9    | 2526.6                     | 3    | 3223.76                    | 4    |
| Serotransferrin                   | 49         | 2063.98                 | 6    | 3117.23                   | 3    | 2066.26                   | 5    | 1488.17                    | 7    | 1504.69                    | 6    |
| Alpha-2-macroglobulin             | 56         | 1660.91                 | 7    | 2021.85                   | 6    | 2494.49                   | 4    | 914.1                      | 9    | 1277.52                    | 7    |
| Apolipoprotein B-100              | 98         | 1433.53                 | 8    | 1805.88                   | 8    | 1172.19                   | 11   | 1788.95                    | 5    | 845.83                     | 10   |

|                               |    |         |           |         |           |         |           |         |           |         |           |
|-------------------------------|----|---------|-----------|---------|-----------|---------|-----------|---------|-----------|---------|-----------|
| Fibrinogen alpha chain        | 29 | 1398.07 | <b>9</b>  | 1190.19 | 11        | 1046.5  | 12        | 1716.15 | <b>6</b>  | 1621.09 | <b>5</b>  |
| Complement C3                 | 85 | 1241.86 | <b>10</b> | 1630.82 | <b>10</b> | 1934.62 | <b>6</b>  | 629.95  | 11        | 809.19  | 11        |
| Apolipoprotein A-I            | 26 | 1215.53 | 11        | 1686.24 | <b>9</b>  | 1677.63 | <b>8</b>  | 663.69  | <b>10</b> | 848.07  | <b>9</b>  |
| Haptoglobin                   | 24 | 844.55  | 12        | 951.8   | 12        | 1385.04 | <b>10</b> | 489.07  | 13        | 593.65  | 13        |
| ECM                           |    |         |           |         |           |         |           |         |           |         |           |
| Collagen alpha-1(II) chain    | 67 | 6790.18 | <b>1</b>  | 7460.49 | <b>1</b>  | 9029.08 | <b>1</b>  | 4242.75 | <b>2</b>  | 6741.27 | <b>1</b>  |
| Collagen alpha-1(XXIV) chain  | 32 | 5961.83 | <b>2</b>  | 6165.53 | <b>2</b>  | 6751.05 | <b>2</b>  | 6632.97 | <b>1</b>  | 4151.97 | <b>2</b>  |
| Collagen alpha-2(I) chain     | 63 | 3161.86 | <b>3</b>  | 4888.26 | <b>3</b>  | 3259.09 | <b>4</b>  | 2581.8  | <b>4</b>  | 1727.23 | <b>7</b>  |
| Collagen alpha-1(XXII) chain  | 44 | 3020.04 | <b>4</b>  | 3711.8  | <b>4</b>  | 3618.18 | <b>3</b>  | 1273.31 | <b>7</b>  | 3652.71 | <b>3</b>  |
| Collagen alpha-6(IV) chain    | 24 | 2429.28 | <b>5</b>  | 1880    | <b>6</b>  | 1688.34 | <b>6</b>  | 2833.78 | <b>3</b>  | 3339.13 | <b>4</b>  |
| Collagen alpha-1(VII) chain   | 56 | 1996.28 | <b>6</b>  | 1277.07 | <b>7</b>  | 1866.92 | <b>5</b>  | 1819.9  | <b>5</b>  | 3170.47 | <b>5</b>  |
| Collagen alpha-2(XI) chain    | 52 | 1264.12 | <b>7</b>  | 593.05  | 12        | 1083.86 | <b>9</b>  | 945.27  | <b>8</b>  | 2599.27 | <b>6</b>  |
| Collagen alpha-1(III) chain   | 73 | 1181.17 | <b>8</b>  | 1924.21 | <b>5</b>  | 866.5   | 11        | 279.47  | 19        | 1680.94 | <b>8</b>  |
| Collagen alpha-1(V) chain     | 34 | 1154.63 | <b>9</b>  | 735.27  | <b>9</b>  | 1084.91 | <b>8</b>  | 1275.41 | <b>6</b>  | 1572.68 | <b>9</b>  |
| Collagen alpha-3(VI) chain    | 72 | 869.6   | <b>10</b> | 634.54  | 11        | 924.04  | <b>10</b> | 894.08  | <b>9</b>  | 1060.83 | 11        |
| Collagen alpha-1(XXVII) chain | 31 | 763.05  | 11        | 685.98  | <b>10</b> | 1110.34 | <b>7</b>  | 650.47  | <b>10</b> | 637.01  | 17        |
| Collagen alpha-1(XIX) chain   | 31 | 749.88  | 12        | 1114.74 | <b>8</b>  | 818.81  | 12        | 195.3   | 21        | 902.27  | 14        |
| Collagen alpha-2(IV) chain    | 31 | 676.35  | 13        | 423.96  | 13        | 587.31  | 16        | 631.05  | 11        | 1112.69 | <b>10</b> |

**Table 6-S.** Selected proteins with significantly different abundance between 2 and 5 min exposure *in situ*. Differentially abundant proteins among top 200 proteins identified with the highest number of peptides (based on all datasets) are presented. For these proteins, respective results are also provided for the comparison between the different implant surfaces. Significant changes ( $p < 0.05$ ) in the respective comparisons are highlighted in bold. Fold change was calculated by dividing the average abundance of the respective proteins from the case versus the control group.

| Name                                                           | #<br>peptides | Rough<br>surface:<br>5 min vs 2 min |                 | Smooth<br>surface:<br>5 min vs 2 min |             | 2 min<br>exposure:<br>Rough vs<br>Smooth |             | 5 min<br>exposure:<br>Rough vs<br>Smooth |             |
|----------------------------------------------------------------|---------------|-------------------------------------|-----------------|--------------------------------------|-------------|------------------------------------------|-------------|------------------------------------------|-------------|
|                                                                |               | Fold<br>change                      | p-<br>valu<br>e | Fold<br>chan<br>ge                   | p-<br>value | Fold<br>chan<br>ge                       | p-<br>value | Fold<br>chang<br>e                       | p-<br>value |
|                                                                |               |                                     |                 |                                      |             |                                          |             |                                          |             |
| Intracellular, Membrane                                        |               |                                     |                 |                                      |             |                                          |             |                                          |             |
| Probable E3 ubiquitin-protein<br>ligase HECTD4                 | 8             | 2.56                                | 0.10            | 8.76                                 | 0.04        | 4.22                                     | 0.20        | 1.24                                     | 0.84        |
| Aldehyde dehydrogenase,<br>mitochondrial                       | 10            | 0.37                                | 0.73            | 8.33                                 | 0.02        | 26.44                                    | 0.05        | 1.16                                     | 0.69        |
| Glutathione S-transferase<br>omega-1                           | 8             | 0.39                                | 0.56            | 6.53                                 | 0.00        | 2.18                                     | 0.55        | 0.13                                     | 0.03        |
| Glycerol-3-phosphate<br>dehydrogenase [NAD(+)],<br>cytoplasmic | 9             | 0.89                                | 0.94            | 5.05                                 | 0.03        | 9.33                                     | 0.03        | 1.65                                     | 0.56        |
| Heat shock protein HSP 90-<br>beta                             | 10            | 0.27                                | 0.14            | 2.57                                 | 0.01        | 4.49                                     | 0.08        | 0.48                                     | 0.16        |
| Hemoglobin subunit gamma-2                                     | 10            | 1.58                                | 0.53            | 2.22                                 | 0.03        | 2.35                                     | 0.08        | 1.67                                     | 0.22        |
| Ankyrin-1                                                      | 33            | 2.08                                | 0.10            | 2.17                                 | 0.04        | 1.19                                     | 0.94        | 1.15                                     | 1.00        |
| Hemoglobin subunit beta                                        | 25            | 0.93                                | 0.63            | 0.54                                 | 0.00        | 0.95                                     | 0.94        | 1.65                                     | 0.03        |
| L-lactate dehydrogenase B<br>chain                             | 12            | 0.99                                | 0.84            | 0.34                                 | 0.03        | 1.36                                     | 0.38        | 3.91                                     | 0.03        |
| Myeloperoxidase                                                | 19            | 0.40                                | 0.05            | 0.29                                 | 0.00        | 2.03                                     | 0.02        | 2.83                                     | 0.03        |
| Rab GDP dissociation inhibitor<br>beta                         | 8             | 0.07                                | 0.01            | 0.06                                 | 0.35        | 4.07                                     | 0.03        | 4.63                                     | 0.06        |
| Secreted to blood                                              |               |                                     |                 |                                      |             |                                          |             |                                          |             |
| Complement C5                                                  | 11            | 1.36                                | 0.52            | 5.60                                 | 0.01        | 9.18                                     | 0.03        | 2.23                                     | 0.22        |
| Plasminogen                                                    | 15            | 1.34                                | 0.62            | 4.83                                 | 0.02        | 4.17                                     | 0.03        | 1.15                                     | 1.00        |
| Coagulation factor XIII A chain                                | 10            | 1.06                                | 0.84            | 3.56                                 | 0.01        | 0.76                                     | 0.47        | 0.23                                     | 0.03        |
| Histidine-rich glycoprotein                                    | 9             | 0.80                                | 0.94            | 3.32                                 | 0.04        | 0.67                                     | 0.30        | 0.16                                     | 0.03        |
| Antithrombin-III                                               | 15            | 0.94                                | 1.00            | 2.16                                 | 0.01        | 1.48                                     | 0.08        | 0.65                                     | 0.03        |
| Leukocyte elastase inhibitor                                   | 10            | 0.71                                | 0.37            | 2.42                                 | 0.01        | 2.52                                     | 0.03        | 0.74                                     | 0.44        |
| ECM                                                            |               |                                     |                 |                                      |             |                                          |             |                                          |             |
| Mucin-19                                                       | 10            | 1.86                                | 0.47            | 9.41                                 | 0.02        | 11.43                                    | 0.21        | 2.26                                     | 0.22        |
| Filaggrin                                                      | 8             | 1.81                                | 0.84            | 7.15                                 | 0.02        | 8.80                                     | 0.02        | 2.22                                     | 0.69        |
| Collagen alpha-1(III) chain                                    | 73            | 0.45                                | 0.37            | 6.01                                 | 0.04        | 6.89                                     | 0.02        | 0.52                                     | 1.00        |
| Collagen alpha-1(XXI) chain                                    | 11            | 1.91                                | 0.07            | 3.41                                 | 0.00        | 1.37                                     | 0.58        | 0.77                                     | 0.16        |
| Collagen alpha-1(XVIII) chain                                  | 17            | 2.40                                | 0.10            | 3.30                                 | 0.03        | 1.10                                     | 0.80        | 0.80                                     | 0.16        |
| Collagen alpha-2(IX) chain                                     | 15            | 3.80                                | 0.05            | 3.26                                 | 0.04        | 1.56                                     | 0.67        | 1.82                                     | 0.31        |
| Collagen alpha-1(XXII) chain                                   | 44            | 0.97                                | 0.95            | 2.87                                 | 0.01        | 2.92                                     | 0.05        | 0.99                                     | 0.84        |
| Collagen alpha-3(V) chain                                      | 35            | 1.70                                | 0.14            | 2.32                                 | 0.04        | 1.88                                     | 0.11        | 1.37                                     | 0.31        |
| Collagen alpha-1(XI) chain                                     | 41            | 1.20                                | 0.45            | 2.27                                 | 0.03        | 0.99                                     | 0.94        | 0.52                                     | 0.03        |
| Collagen alpha-6(VI) chain                                     | 20            | 0.80                                | 0.84            | 0.69                                 | 0.04        | 1.18                                     | 0.30        | 1.37                                     | 0.16        |
| Collagen alpha-4(IV) chain                                     | 45            | 1.95                                | 0.01            | 1.42                                 | 0.35        | 0.97                                     | 0.94        | 1.33                                     | 0.31        |

**Table 8-S.** Selected proteins with significantly changed abundance between rough and smooth surfaces at two different exposure times *in situ*. Differentially abundant proteins among top 200 proteins identified with the highest number of peptides (based on all datasets) are presented. For these proteins, respective results are also given for the comparison between the different exposure times. Significant changes (p<0.05) in the respective comparisons are highlighted in bold. Fold change was calculated by dividing the average abundance of the respective proteins from the case versus the control group.

| Name                                                     | #<br>peptides | 2 min exposure:<br>Rough versus<br>Smooth |         | 5 min exposure:<br>Rough versus<br>Smooth |         | Rough surface:<br>5 min vs 2 min |         | Smooth surface:<br>5 min vs 2 min |         |
|----------------------------------------------------------|---------------|-------------------------------------------|---------|-------------------------------------------|---------|----------------------------------|---------|-----------------------------------|---------|
|                                                          |               | Fold<br>change                            | p-value | Fold<br>change                            | p-value | Fold<br>change                   | p-value | Fold<br>change                    | p-value |
|                                                          |               |                                           |         |                                           |         |                                  |         |                                   |         |
| Intracellular, Membrane                                  |               |                                           |         |                                           |         |                                  |         |                                   |         |
| Nuclear receptor corepressor 2                           | 8             | 3.31                                      | 0.02    | 2.40                                      | 0.09    | 0.99                             | 0.95    | 1.36                              | 0.43    |
| 14-3-3 protein epsilon                                   | 10            | 2.99                                      | 0.02    | 3.45                                      | 0.06    | 1.04                             | 0.84    | 0.90                              | 0.83    |
| Endoplasmic reticulum chaperone BiP                      | 10            | 4.97                                      | 0.02    | 1.42                                      | 0.84    | 0.34                             | 0.09    | 1.18                              | 0.71    |
| Transitional endoplasmic reticulum ATPase                | 13            | 3.87                                      | 0.02    | 1.82                                      | 0.09    | 0.93                             | 0.73    | 1.96                              | 0.31    |
| Eosinophil peroxidase                                    | 9             | 8.63                                      | 0.03    | 1.85                                      | 0.21    | 0.41                             | 0.07    | 1.91                              | 0.51    |
| Four and a half LIM domains protein 1                    | 8             | 5.03                                      | 0.03    | 4.08                                      | 0.06    | 0.63                             | 0.29    | 0.78                              | 0.94    |
| Rab GDP dissociation inhibitor beta                      | 8             | 4.07                                      | 0.03    | 4.63                                      | 0.06    | 0.07                             | 0.01    | 0.06                              | 0.35    |
| Filamin-A                                                | 33            | 2.97                                      | 0.03    | 1.28                                      | 0.31    | 1.32                             | 0.37    | 3.05                              | 0.62    |
| Protein piccolo                                          | 8             | 20.26                                     | 0.03    | 1.51                                      | 0.69    | 0.36                             | 0.62    | 4.85                              | 0.09    |
| Glycerol-3-phosphate dehydrogenase [NAD(+)], cytoplasmic | 9             | 9.33                                      | 0.03    | 1.65                                      | 0.56    | 0.89                             | 0.94    | 5.05                              | 0.03    |
| Alcohol dehydrogenase 1B                                 | 8             | 8.93                                      | 0.03    | 6.96                                      | 0.09    | 1.37                             | 0.52    | 1.76                              | 0.31    |
| Aldehyde dehydrogenase, mitochondrial                    | 10            | 26.44                                     | 0.05    | 1.16                                      | 0.69    | 0.37                             | 0.73    | 8.33                              | 0.02    |
| Protein bassoon                                          | 9             | 2.82                                      | 0.05    | 1.44                                      | 0.44    | 0.58                             | 0.23    | 1.14                              | 0.94    |
| Tropomyosin beta chain                                   | 17            | 3.20                                      | 0.02    | 6.02                                      | 0.03    | 0.37                             | 0.45    | 0.20                              | 0.83    |
| Myeloperoxidase                                          | 19            | 2.03                                      | 0.02    | 2.83                                      | 0.03    | 0.40                             | 0.05    | 0.29                              | 0.00    |
| Malate dehydrogenase, cytoplasmic                        | 8             | 6.28                                      | 0.03    | 6.93                                      | 0.03    | 0.67                             | 0.84    | 0.60                              | 0.51    |
| Hemoglobin subunit delta                                 | 12            | 2.84                                      | 0.03    | 2.58                                      | 0.03    | 0.86                             | 0.73    | 0.95                              | 0.63    |
| Histone H4                                               | 10            | 2.43                                      | 0.03    | 2.52                                      | 0.03    | 1.38                             | 0.37    | 1.33                              | 0.63    |
| Keratin, type II cytoskeletal 2 epidermal                | 25            | 0.12                                      | 0.03    | 0.09                                      | 0.03    | 0.80                             | 0.73    | 1.00                              | 0.73    |
| Myosin-7                                                 | 99            | 3.40                                      | 0.03    | 4.10                                      | 0.03    | 0.92                             | 0.95    | 0.76                              | 0.84    |
| Tubulin alpha-1B chain                                   | 9             | 0.61                                      | 0.02    | 0.38                                      | 0.03    | 0.87                             | 0.45    | 1.39                              | 0.18    |
| Isocitrate dehydrogenase [NADP], mitochondrial           | 10            | 14.95                                     | 0.10    | Only Rough                                | 0.03    | 0.44                             | 0.94    | Only Rough                        | 0.21    |
| ADP/ATP translocase 1                                    | 8             | 5.88                                      | 0.05    | 22.48                                     | 0.04    | 0.72                             | 0.89    | 0.19                              | 0.14    |
| Protein 4.1                                              | 10            | 13.95                                     | 0.10    | 15.43                                     | 0.03    | 1.98                             | 0.35    | 1.79                              | 0.47    |
| Prelamin-A/C                                             | 17            | 3.98                                      | 0.21    | 13.29                                     | 0.03    | 1.62                             | 0.28    | 0.49                              | 0.59    |
| ATP synthase subunit alpha, mitochondrial                | 12            | 2.52                                      | 0.27    | 10.00                                     | 0.03    | 0.50                             | 0.94    | 0.13                              | 0.51    |
| Alpha-crystallin B chain                                 | 8             | 21.87                                     | 0.05    | 7.80                                      | 0.03    | 1.33                             | 0.35    | 3.73                              | 0.63    |

|                                                 |    |       |      |             |             |      |      |             |             |
|-------------------------------------------------|----|-------|------|-------------|-------------|------|------|-------------|-------------|
| Myosin light chain 1/3, skeletal muscle isoform | 9  | 1.92  | 0.20 | <b>7.74</b> | <b>0.03</b> | 2.07 | 0.14 | 0.51        | 0.88        |
| Myosin light chain 3                            | 9  | 2.13  | 0.30 | <b>6.33</b> | <b>0.03</b> | 0.52 | 0.45 | 0.17        | 1.00        |
| Coronin-1A                                      | 8  | 10.30 | 0.11 | <b>6.11</b> | <b>0.03</b> | 0.27 | 0.53 | 0.46        | 0.82        |
| Triosephosphate isomerase                       | 12 | 6.40  | 0.16 | <b>6.06</b> | <b>0.03</b> | 0.84 | 0.95 | 0.89        | 1.00        |
| L-lactate dehydrogenase A chain                 | 9  | 3.04  | 0.11 | <b>4.56</b> | <b>0.03</b> | 1.51 | 0.23 | 1.01        | 0.83        |
| L-lactate dehydrogenase B chain                 | 12 | 1.36  | 0.38 | <b>3.91</b> | <b>0.03</b> | 0.99 | 0.84 | <b>0.34</b> | <b>0.03</b> |
| Glyceraldehyde-3-phosphate dehydrogenase        | 12 | 0.95  | 0.58 | <b>3.79</b> | <b>0.03</b> | 0.89 | 0.84 | 0.22        | 0.10        |
| Carbonic anhydrase 2                            | 16 | 1.38  | 0.30 | <b>3.75</b> | <b>0.03</b> | 0.60 | 0.10 | 0.22        | 0.14        |
| Transketolase                                   | 14 | 3.14  | 0.16 | <b>3.35</b> | <b>0.03</b> | 1.42 | 0.37 | 1.32        | 0.66        |
| Vinculin                                        | 8  | 3.24  | 0.11 | <b>3.22</b> | <b>0.03</b> | 1.27 | 0.45 | 1.28        | 0.61        |
| Erythrocyte membrane protein band 4.2           | 10 | 2.05  | 0.11 | <b>3.00</b> | <b>0.03</b> | 0.52 | 0.14 | 0.36        | 0.23        |
| Pyruvate kinase PKM                             | 10 | 2.06  | 0.30 | <b>2.85</b> | <b>0.03</b> | 1.57 | 0.63 | 1.13        | 0.62        |
| Alpha-enolase                                   | 14 | 1.05  | 0.30 | <b>2.75</b> | <b>0.03</b> | 0.60 | 0.37 | 0.23        | 0.62        |
| Vimentin                                        | 24 | 0.81  | 0.94 | <b>2.57</b> | <b>0.03</b> | 0.21 | 0.29 | 0.07        | 0.05        |
| Fructose-bisphosphate aldolase A                | 13 | 2.17  | 0.30 | <b>2.50</b> | <b>0.03</b> | 0.99 | 0.45 | 0.86        | 0.62        |
| Hemoglobin subunit alpha                        | 25 | 1.11  | 0.58 | <b>2.46</b> | <b>0.03</b> | 0.87 | 0.53 | 0.40        | 0.10        |
| Phosphoglycerate kinase 1                       | 9  | 1.97  | 0.22 | <b>2.36</b> | <b>0.03</b> | 1.40 | 0.29 | 1.16        | 0.52        |
| Peroxiredoxin-2                                 | 16 | 1.95  | 0.16 | <b>2.35</b> | <b>0.03</b> | 1.03 | 0.84 | 0.85        | 0.63        |
| Plectin                                         | 11 | 0.05  | 0.93 | <b>2.11</b> | <b>0.03</b> | 2.05 | 0.10 | 0.05        | 0.35        |
| Actin, cytoplasmic 1                            | 16 | 1.52  | 0.30 | <b>2.05</b> | <b>0.03</b> | 0.97 | 1.00 | 0.72        | 1.00        |
| Carbonic anhydrase 1                            | 19 | 1.78  | 0.22 | <b>2.02</b> | <b>0.03</b> | 0.71 | 0.37 | 0.62        | 0.05        |
| Catalase                                        | 25 | 1.66  | 0.08 | <b>1.98</b> | <b>0.03</b> | 0.98 | 0.95 | 0.82        | 0.37        |
| Hemoglobin subunit beta                         | 25 | 0.95  | 0.94 | <b>1.65</b> | <b>0.03</b> | 0.93 | 0.63 | <b>0.54</b> | <b>0.00</b> |
| Alpha-actinin-2                                 | 31 | 1.06  | 0.81 | <b>1.52</b> | <b>0.03</b> | 0.98 | 0.63 | 0.68        | 0.23        |
| Keratin, type I cytoskeletal 9                  | 14 | 0.09  | 0.08 | <b>0.41</b> | <b>0.03</b> | 1.91 | 0.62 | 0.41        | 0.63        |
| Glutathione S-transferase omega-1               | 8  | 2.18  | 0.55 | <b>0.13</b> | <b>0.03</b> | 0.39 | 0.56 | <b>6.53</b> | <b>0.00</b> |

#### Secreted to blood

|                                              |    |             |             |             |             |      |      |             |             |
|----------------------------------------------|----|-------------|-------------|-------------|-------------|------|------|-------------|-------------|
| Fibronectin                                  | 34 | <b>3.60</b> | <b>0.02</b> | 1.25        | 0.56        | 0.72 | 0.23 | 2.07        | 0.18        |
| Annexin A2                                   | 15 | <b>3.15</b> | <b>0.02</b> | 7.27        | 0.09        | 1.63 | 1.00 | 0.71        | 0.83        |
| Leukocyte elastase inhibitor                 | 10 | <b>2.52</b> | <b>0.03</b> | 0.74        | 0.44        | 0.71 | 0.37 | <b>2.42</b> | <b>0.01</b> |
| Plasminogen                                  | 15 | <b>4.17</b> | <b>0.03</b> | 1.15        | 1.00        | 1.34 | 0.62 | <b>4.83</b> | <b>0.02</b> |
| Complement C5                                | 11 | <b>9.18</b> | <b>0.03</b> | 2.23        | 0.22        | 1.36 | 0.52 | <b>5.60</b> | <b>0.01</b> |
| Afamin                                       | 11 | <b>8.08</b> | <b>0.03</b> | 1.77        | 0.31        | 0.78 | 0.72 | 3.55        | 0.10        |
| Alpha-2-macroglobulin                        | 56 | <b>2.21</b> | <b>0.05</b> | 1.95        | 0.09        | 1.23 | 0.45 | 1.40        | 0.29        |
| Complement C3                                | 85 | <b>2.59</b> | <b>0.05</b> | 2.39        | 0.06        | 1.19 | 0.84 | 1.28        | 0.63        |
| Complement factor B                          | 17 | <b>3.61</b> | <b>0.02</b> | <b>4.34</b> | <b>0.03</b> | 0.68 | 0.29 | 0.57        | 0.72        |
| Alpha-1-antitrypsin                          | 27 | <b>2.49</b> | <b>0.05</b> | <b>3.18</b> | <b>0.03</b> | 1.27 | 0.37 | 1.00        | 0.37        |
| Apolipoprotein A-I                           | 26 | <b>2.54</b> | <b>0.05</b> | <b>1.98</b> | <b>0.03</b> | 0.99 | 0.84 | 1.28        | 0.37        |
| Angiotensinogen                              | 9  | <b>2.73</b> | <b>0.03</b> | <b>1.81</b> | <b>0.03</b> | 1.38 | 0.43 | 2.08        | 0.22        |
| Complement C4-B                              | 43 | <b>4.36</b> | <b>0.05</b> | <b>4.06</b> | <b>0.03</b> | 1.02 | 0.84 | 1.10        | 0.43        |
| Antithrombin-III                             | 15 | 1.48        | 0.08        | <b>0.65</b> | <b>0.03</b> | 0.94 | 1.00 | <b>2.16</b> | <b>0.01</b> |
| Inter-alpha-trypsin inhibitor heavy chain H2 | 14 | 4.05        | 0.16        | <b>4.40</b> | <b>0.03</b> | 1.04 | 0.84 | 0.96        | 0.83        |

|                                              |    |              |             |              |             |      |      |             |             |
|----------------------------------------------|----|--------------|-------------|--------------|-------------|------|------|-------------|-------------|
| Plasma kallikrein                            | 12 | 4.04         | 0.21        | <b>14.63</b> | <b>0.03</b> | 2.52 | 0.28 | 0.70        | 0.82        |
| Neutrophil elastase                          | 8  | 3.25         | 0.22        | <b>3.89</b>  | <b>0.03</b> | 0.98 | 0.84 | 0.82        | 0.94        |
| Haptoglobin                                  | 24 | 1.95         | 0.30        | <b>2.33</b>  | <b>0.03</b> | 1.46 | 0.45 | 1.21        | 0.73        |
| Histidine-rich glycoprotein                  | 9  | 0.67         | 0.30        | <b>0.16</b>  | <b>0.03</b> | 0.80 | 0.94 | <b>3.32</b> | <b>0.04</b> |
| Inter-alpha-trypsin inhibitor heavy chain H1 | 9  | 2.55         | 0.35        | <b>2.55</b>  | <b>0.03</b> | 0.54 | 0.84 | 0.54        | 0.94        |
| Hemopexin                                    | 17 | 0.74         | 0.47        | <b>1.57</b>  | <b>0.03</b> | 1.13 | 0.95 | 0.54        | 0.37        |
| Coagulation factor XIII A chain              | 10 | 0.76         | 0.47        | <b>0.23</b>  | <b>0.03</b> | 1.06 | 0.84 | <b>3.56</b> | <b>0.01</b> |
| Apolipoprotein B-100                         | 98 | 1.01         | 0.69        | <b>1.39</b>  | <b>0.03</b> | 0.65 | 0.14 | 0.47        | 1.00        |
| Fibrinogen gamma chain                       | 26 | 0.73         | 0.22        | <b>0.49</b>  | <b>0.03</b> | 0.86 | 0.45 | 1.28        | 0.45        |
| ECM                                          |    |              |             |              |             |      |      |             |             |
| Collagen alpha-1(II) chain                   | 67 | <b>1.76</b>  | <b>0.02</b> | 1.34         | 0.44        | 1.21 | 0.95 | 1.59        | 0.45        |
| Collagen alpha-1(III) chain                  | 73 | <b>6.89</b>  | <b>0.02</b> | 0.52         | 1.00        | 0.45 | 0.37 | <b>6.01</b> | <b>0.04</b> |
| Collagen alpha-3(IV) chain                   | 13 | <b>7.07</b>  | <b>0.02</b> | 0.27         | 0.56        | 0.45 | 0.37 | 11.56       | 0.17        |
| Collagen alpha-1(XXVIII) chain               | 17 | <b>2.75</b>  | <b>0.02</b> | 1.99         | 0.44        | 0.81 | 1.00 | 1.12        | 0.35        |
| Filaggrin                                    | 8  | <b>8.80</b>  | <b>0.02</b> | 2.22         | 0.69        | 1.81 | 0.84 | <b>7.15</b> | <b>0.02</b> |
| Collagen alpha-6(IV) chain                   | 24 | <b>0.66</b>  | <b>0.03</b> | 0.51         | 0.06        | 0.90 | 0.95 | 1.18        | 0.63        |
| Collagen alpha-1(XXII) chain                 | 44 | <b>2.92</b>  | <b>0.05</b> | 0.99         | 0.84        | 0.97 | 0.95 | <b>2.87</b> | <b>0.01</b> |
| Collagen alpha-1(XV) chain                   | 9  | <b>3.71</b>  | <b>0.02</b> | <b>2.62</b>  | <b>0.03</b> | 0.72 | 1.00 | 1.03        | 0.22        |
| Decorin                                      | 9  | <b>10.76</b> | <b>0.02</b> | <b>10.38</b> | <b>0.03</b> | 1.39 | 0.37 | 1.44        | 0.94        |
| Collagen alpha-1(XIII) chain                 | 27 | <b>2.26</b>  | <b>0.05</b> | <b>2.04</b>  | <b>0.03</b> | 0.75 | 0.45 | 0.83        | 0.72        |
| Collagen alpha-1(XIV) chain                  | 20 | 1.94         | 0.21        | <b>2.60</b>  | <b>0.03</b> | 2.00 | 0.10 | 1.50        | 0.22        |
| Lumican                                      | 8  | 1.47         | 0.26        | <b>13.21</b> | <b>0.03</b> | 2.18 | 0.10 | 0.24        | 0.61        |
| Collagen alpha-1(XI) chain                   | 41 | 0.99         | 0.94        | <b>0.52</b>  | <b>0.03</b> | 1.20 | 0.45 | <b>2.27</b> | <b>0.03</b> |
